# Supplementary material for: Avirulence genes identified through linkage mapping and region-specific association studies in the wheat leaf rust pathogen Puccinia triticina
Source: Research Square preprint supplement (doi:10.21203/rs.3.rs-7264203/v1), 2025-08-22
Supplement: Supplementary file 3 [file 368c5ed5f4395d632deadc2c.xlsx]

## Sheet: Table S3
Table S3. Virulence phenotypes of the Puccinia triticina parental isolates of the sexual cross race 9 x race 161 and the resulting F1 and 57 F2 progeny (row 2), scored on 20 differential near-isogenic wheat lines (NILs) having the corresponding single Lr resistance gene (column A).
Avr	race9	race161	F1	exp. ratio	1A	3A	4A	5A	6A	11A	12A	13A	14A	19A	24A	31A	35A	1B	3B	5B	6B	12B	13B	16B	19B	23B	24B	34B	S1	S2	S5	S6	S9	S11	S13	S22	S23	S26	S31	S32	S33	S34	S38	S39	S41	S42	S45	S47	S49
AvrLr1	1	0	0	3:1	0	0	0	1	0	1	0	1	1	1	0	0	1	0	0	0	0	0	1	0	0	0	0	0	0	0	0	0	0	1	1	0	0	0	1	0	0	1	0	0	0	1	1	1	0
AvrLr2a	1	0	0	7:9	0	0	0	0	1	0	1	1	1	1	1	0	1	0	0	1	1	0	1	0	0	1	1	0	0	0	1	1	1	1	1	0	1	1	1	1	1	1	1	1	1	0	1	1	1
AvrLr2c	1	1	1	1:3	1	0	0	1	1	0	1	1	1	1	0	1	1	1	1	0	1	0	1	0	0	1	1	0	0	1	1	1	1	1	1	0	1	1	1	1	1	1	1	1	1	0	1	1	1
AvrLr3	0	1	0	HA	0	0	1	0	0	0	0	0	0	1	0	0	0	0	0	0	0	0	0	0	1	0	0	0	0	0	0	0	0	0	0	1	0	0	0	0	0	0	0	0	0	0	0	1	0
AvrLr9	0	0	0	HA	0	0	0	0	0	0	0	0	0	0	0	0	0	0	0	0	0	0	0	0	0	0	0	0	0	0	0	0	0	0	0	0	0	0	0	0	0	0	0	0	0	0	0	0	0
AvrLr16	0	0	0	HA	0	0	0	0	0	0	0	0	0	0	0	0	0	0	0	0	0	0	0	0	0	0	0	0	0	0	0	0	0	0	0	0	0	0	0	0	0	0	0	0	0	0	0	0	0
AvrLr24	0	0	0	HA	0	0	0	0	0	0	0	0	0	0	0	0	0	0	0	0	0	0	0	0	0	0	0	0	0	0	0	0	0	0	0	0	0	0	0	0	0	0	0	0	0	0	0	0	0
AvrLr26	0	0	0	HA	0	0	0	0	0	0	0	0	0	0	0	0	0	0	0	0	0	0	0	0	0	0	0	0	0	0	0	0	0	0	0	0	0	0	0	0	0	0	0	0	0	0	0	0	0
AvrLr3ka	0	0	0	HA	0	0	0	0	0	0	0	0	0	0	0	0	0	0	0	0	0	0	0	0	0	0	0	0	0	0	0	0	0	0	0	0	0	0	0	0	0	0	0	0	0	0	0	0	0
AvrLr11	0	0	0	3:1	0	0	0	0	0	0	0	0	0	0	0	0	0	0	0	1	0	1	0	0	0	0	0	0	1	0	0	0	0	0	0	0	0	0	1	0	0	0	0	0	0	0	0	0	0
AvrLr17	1	1	1	HV	1	1	1	1	1	1	1	1	1	1	1	1	1	1	1	1	1	1	1	1	0	1	1	1	1	1	1	1	1	1	1	1	1	1	1	1	1	1	1	1	1	1	1	1	1
AvrLr30	0	0	0	HA	0	0	0	0	0	0	0	0	0	0	0	0	0	0	0	0	0	0	0	0	0	0	0	0	0	0	0	0	0	0	0	0	0	0	0	0	0	0	0	0	0	0	0	0	0
AvrLrB	0	1	1	1:3	1	1	1	1	1	0	0	0	0	1	1	1	0	1	0	0	1	0	0	1	1	1	0	1	1	1	1	1	1	0	0	1	0	1	1	1	1	0	1	1	1	1	0	1	1
AvrLr10	1	1	1	HV	1	1	1	1	1	1	1	1	1	1	1	1	1	1	1	0	1	1	1	1	1	1	1	1	1	1	1	1	1	1	1	1	1	1	1	1	1	1	1	1	1	1	1	1	1
AvrLr14a	0	1	0	3:1	0	1	0	0	0	0	1	0	0	1	0	0	1	0	1	0	0	1	1	0	1	0	0	0	0	0	1	1	0	0	0	1	0	1	0	0	1	0	1	0	0	0	0	1	0
AvrLr18	0	0	0	HA	0	0	0	0	0	0	0	0	1	0	0	0	0	0	0	0	0	0	0	0	1	0	0	0	0	0	0	0	0	0	0	0	0	0	0	0	0	0	0	0	0	0	0	0	0
AvrLr3bg	0	1	0	13:3	0	0	0	0	1	0	0	0	0	0	0	0	0	0	0	1	1	0	0	0	0	0	0	0	0	0	0	0	0	0	0	0	0	0	0	0	0	0	0	0	0	0	0	1	0
AvrLr14b	1	0	1	1:3	1	1	1	1	0	1	1	1	1	1	1	1	0	1	1	0	0	1	1	0	1	0	1	1	1	1	0	0	1	1	1	1	1	1	0	1	0	1	0	1	1	1	1	1	1
AvrLr20	1	1	1	HV	1	1	1	1	1	1	1	1	1	1	1	1	1	1	1	1	1	1	1	1	1	1	1	1	1	1	1	1	1	1	1	1	1	1	1	1	1	1	1	1	1	1	1	1	1
AvrLr28	1	1	1	1:3	1	0	1	1	1	1	1	1	1	1	1	1	0	1	0	1	1	0	1	0	1	0	1	1	1	1	1	1	1	1	1	1	1	1	1	1	1	1	1	1	1	1	1	1	1
				HA=homozygous avirulent; HV=homozygous virulent
NCBI-SRA name	SBDGK_59_CANrace9-1_DNA	FBDSP_60_CANrace161-1_DNA	Pt_F1_RCH_193		Pt_F2_1A_RCH_136	Pt_F2_3A _RCH_137	Pt_F2_4A_RCH_138	Pt_F2_5A_RCH_139	Pt_F2_6A_RCH_140	Pt_F2_11A _RCH_141	Pt_F2_12A_RCH_142	Pt_F2_13A_RCH_143	Pt_F2_14A_RCH_144		Pt_F2_24A_RCH_146	Pt_F2_31A_RCH_147	Pt_F2_35A_RCH_148	Pt_F2_1B_RCH_149	Pt_F2_3B_RCH_150	Pt_F2_5B_RCH_151	Pt_F2_6B_RCH_152	Pt_F2_12B _RCH_153	Pt_F2_13B_RCH_154	Pt_F2_16B_RCH_155		Pt_F2_23B _RCH_157	Pt_F2_24B_RCH_158	Pt_F2_34B_RCH_159	Pt_F2_S-1_RCH_160	Pt_F2_S-2_RCH_161	Pt_F2_S-5 _RCH_162	Pt_F2_S-6 _RCH_163	Pt_F2_S-9 _RCH_164	Pt_F2_S-11 _RCH_165	Pt_F2_S-13_RCH_166		Pt_F2_S-23 _RCH_168	Pt_F2_S-26 _RCH_169	Pt_F2_S-31_RCH_170	Pt_F2_S-32 _RCH_171	Pt_F2_S-33_RCH_172	Pt_F2_S-34 _RCH_173	Pt_F2_S-38_RCH_174	Pt_F2_S-39_RCH_175	Pt_F2_S-41_RCH_176	Pt_F2_S-42 _RCH_177	Pt_F2_S-45_RCH_178		Pt_F2_S-49 _RCH_180
NCBI-SRA #	SRR29057043	SRR29057044	SRR33450201		SRR33450250	SRR33450249	SRR33450238	SRR33450227	SRR33450216	SRR33450205	SRR33450200	SRR33450199	SRR33450198		SRR33450197	SRR33450248	SRR33450247	SRR33450246	SRR33450245	SRR33450244	SRR33450243	SRR33450242	SRR33450241	SRR33450240		SRR33450239	SRR33450237	SRR33450236	SRR33450235	SRR33450234	SRR33450233	SRR33450232	SRR33450231	SRR33450230	SRR33450229		SRR33450228	SRR33450226	SRR33450225	SRR33450224	SRR33450223	SRR33450222	SRR33450221	SRR33450220	SRR33450219	SRR33450218	SRR33450217		SRR33450215
Four progeny, 19A, 19B, S22 and S47 (orange columns), were judged to be contaminants and eliminated from the study.
[truncated: 13 more columns]
