# Supplementary material for: Avirulence genes identified through linkage mapping and region-specific association studies in the wheat leaf rust pathogen Puccinia triticina
Source: Research Square preprint supplement (doi:10.21203/rs.3.rs-7264203/v1), 2025-08-22
Supplement: Supplementary file 4 [file 49989e694bdd0e5e280d87a9.xlsx]

## Sheet: Table S1
Table S1. Phenotypes of Puccinia triticina isolates in a natural population collected in Canada and screened on differential wheat NILs harboring the indicated Lr resistance gene. Includes gDNA Illumina sequencing information on the samples (see Formby et al., 2025).
Sample a		Lr1	Lr2a	Lr2c	Lr3	Lr9	Lr16	Lr24	Lr26	Lr3ka	Lr11	Lr17	Lr30	LrB	Lr10	Lr14a	Lr18	Lr3bg	Lr14b	Lr20	Lr28	clade b	kraken2 (percent coverage Pt)	NCBI-SRA accession
MBBJT_98_AB156-1		1	0	0	1	0	0	0	0	0	0	0	0	0	1	1	0	1	1	1	1	NA5	92.58	SAMN41404071	Formby et al., 2025
MBBJT_99_AB203-1		1	0	0	1	0	0	0	0	0	0	0	0	0	1	1	0	1	1	1	1	NA5	87.81	SAMN41404072	Formby et al., 2025
MBDSS_02_CAN124-1		1	0	0	1	0	0	0	0	0	0	1	0	1	1	1	0	1	1	1	0	NA3	90.31	SAMN41404073	Formby et al., 2025
MBDSS_02_MB78-1		1	0	0	1	0	0	0	0	0	0	1	0	1	1	1	0	1	1	1	0	NA3	59.53	SAMN41404074	Formby et al., 2025
MBGJK_99_AB205-2		1	0	0	1	0	0	0	0	0	1	0	0	0	1	1	0	0	1	1	1	NA5	91.47	SAMN41404075	Formby et al., 2025
MBNSS_02_MB58-1		1	0	0	1	0	0	0	0	1	0	1	0	1	1	1	0	1	1	1	0	NA3	90.14	SAMN48203071	this work
MBNSS_02_MB62-1		1	0	0	1	0	0	0	0	1	0	1	0	1	1	1	0	1	1	1	0	NA3	89.94	SAMN41404076	Formby et al., 2025
MBPSS_02_MB27-1		1	0	0	1	0	0	0	0	1	0	1	1	1	1	1	0	1	1	1	0	NA3	82.45	SAMN41404077	Formby et al., 2025
MBRDK_98_MB116-1		1	0	0	1	0	0	0	0	1	1	0	1	0	0	1	0	0	1	1	1	NA5	87.4	SAMN41404078	Formby et al., 2025
MBRJK_98_MB4-1		1	0	0	1	0	0	0	0	1	1	0	1	0	1	1	0	0	1	1	1	NA5	7.33	SAMN48203072	this work
MBRKT_99_ON220-1		1	0	0	1	0	0	0	0	1	1	0	1	0	1	1	1	1	1	1	1	NA5	93.3	SAMN41404079	Formby et al., 2025
MBTNJ_10_ON254-3		1	0	0	1	0	0	0	0	1	1	1	1	1	0	1	0	0	1	1	0	NA3	17.77	SAMN48203073	this work
MBTNN_10_NS304-1		1	0	0	1	0	0	0	0	1	1	1	1	1	0	1	0	1	0	1	0	NA3	85.01	SAMN41404080	Formby et al., 2025
MBTNS_10_ON271-1		1	0	0	1	0	0	0	0	1	1	1	1	1	0	1	0	1	1	1	0	NA3	90.82	SAMN41404081	Formby et al., 2025
MCGJK_09_ON140-2		1	0	0	1	0	0	0	1	0	1	0	0	0	1	1	0	0	1	1	1	NA5	89.5	SAMN41404082	Formby et al., 2025
MCQJK_12_ON179-1		1	0	0	1	0	0	0	1	1	1	0	0	0	1	1	0	0	1	1	1	NA5	78.59	SAMN41404083	Formby et al., 2025
MCQKT_09_PEI165-1		1	0	0	1	0	0	0	1	1	1	0	0	0	1	1	1	1	1	1	1	NA5	90.94	SAMN41404084	Formby et al., 2025
MCRJ_10_ON257-3		1	0	0	1	0	0	0	1	1	1	0	1	0	1	1	0	0	0	0	0	NA5	89.93	SAMN41404085	Formby et al., 2025
MDNSS_09_SK113-1		1	0	0	1	0	0	1	0	1	0	1	0	1	1	1	0	1	1	1	0	NA3	91.8	SAMN41404086	Formby et al., 2025
MDPSS_09_SK123-1		1	0	0	1	0	0	1	0	1	0	1	1	1	1	1	0	1	1	1	0	NA3	48.45	SAMN41404087	Formby et al., 2025
MDTSS_10_MB95-2		1	0	0	1	0	0	1	0	1	1	1	1	1	1	1	0	1	1	1	0	NA3	77.23	SAMN41404088	Formby et al., 2025
MDTSS_12_QC200-1		1	0	0	1	0	0	1	0	1	1	1	1	1	1	1	0	1	1	1	0	NA3	88.84	SAMN41404089	Formby et al., 2025
MFPSN_11_SK258-1		1	0	0	1	0	0	1	1	1	0	1	1	1	1	1	0	1	0	1	0	NA3	93.13	SAMN41404090	Formby et al., 2025
MFPSS_07_SK181-1		1	0	0	1	0	0	1	1	1	0	1	1	1	1	1	0	1	1	1	0	NA3	90.64	SAMN41404091	Formby et al., 2025
MFPSS_11_MB109-1		1	0	0	1	0	0	1	1	1	0	1	1	1	1	1	0	1	1	1	0	NA3	66.26	SAMN41404092	Formby et al., 2025
MFSSS_11_ON337-2		1	0	0	1	0	0	1	1	1	1	1	0	1	1	1	0	1	1	1	0	NA3	90.53	SAMN41404093	Formby et al., 2025
MLDSS_07_MB16-1		1	0	0	1	1	0	0	0	0	0	1	0	1	1	1	0	1	1	1	0	NA3	19.82	SAMN48203074	this work
MLDSS_07_ON223-1		1	0	0	1	1	0	0	0	0	0	1	0	1	1	1	0	1	1	1	0	NA3	8.85	SAMN48203075	this work
MLDSS_10_MB19-2		1	0	0	1	1	0	0	0	0	0	1	0	1	1	1	0	1	1	1	0	NA3	90.38	SAMN41404094	Formby et al., 2025
MLDSS_10_MB5-1		1	0	0	1	1	0	0	0	0	0	1	0	1	1	1	0	1	1	1	0	NA3	91.75	SAMN41404095	Formby et al., 2025
MLDSS_11_MB153-1		1	0	0	1	1	0	0	0	0	0	1	0	1	1	1	0	1	1	1	0	NA3	85.68	SAMN41404096	Formby et al., 2025
MLDSS_11_MB57-1		1	0	0	1	1	0	0	0	0	0	1	0	1	1	1	0	1	1	1	0	NA3	85.71	SAMN41404097	Formby et al., 2025
PBLRK_01_ON171-2		1	0	1	1	0	0	0	0	1	0	0	0	1	1	0	1	0	1	1	1	NA2-2	91.03	SAMN41404098	Formby et al., 2025
PBLRT_01_ON171-1		1	0	1	1	0	0	0	0	1	0	0	0	1	1	0	1	1	1	1	1	NA2-2	86.57	SAMN41404099	Formby et al., 2025
PBMRT_01_ON176-1		1	0	1	1	0	0	0	0	1	0	0	1	1	1	0	1	1	1	1	1	NA2-2	86.97	SAMN41404100	Formby et al., 2025
PCMRT_01_ON183-2		1	0	1	1	0	0	0	1	1	0	0	1	1	1	0	1	1	1	1	1	NA2-2	89.29	SAMN41404101	Formby et al., 2025
PCMRT_02_ON163-1		1	0	1	1	0	0	0	1	1	0	0	1	1	1	0	1	1	1	1	1	NA5	96.61	SAMN41404102	Formby et al., 2025
TBBGT_12_SK109-2		1	1	1	1	0	0	0	0	0	0	0	0	0	1	0	0	1	1	1	1	NA2	90.45	SAMN41404103	Formby et al., 2025
TBBJK_06_MB7-1		1	1	1	1	0	0	0	0	0	0	0	0	0	1	1	0	0	1	1	1	NA5	16.54	SAMN48203076	this work
TBBJT_06_MB47-2		1	1	1	1	0	0	0	0	0	0	0	0	0	1	1	0	1	1	1	1	NA5	89.64	SAMN41404104	Formby et al., 2025
TBNSS_07_SK188-1		1	1	1	1	0	0	0	0	1	0	1	0	1	1	1	0	1	1	1	0	NA3	87.83	SAMN41404105	Formby et al., 2025
TBNTS_04_MB143-1		1	1	1	1	0	0	0	0	1	0	1	0	1	1	1	1	1	1	1	0	NA3	88.44	SAMN41404106	Formby et al., 2025
TBRKK_09_ON136-2		1	1	1	1	0	0	0	0	1	1	0	1	0	1	1	1	0	1	1	1	NA5	89.43	SAMN41404107	Formby et al., 2025
TBRKK_11_ON303-1		1	1	1	1	0	0	0	0	1	1	0	1	0	1	1	1	0	1	1	1	NA5	90.2	SAMN41404108	Formby et al., 2025
TDBG_11_MB180-1		1	1	1	1	0	0	1	0	0	0	0	0	0	1	0	0	0	0	0	0	NA5	71.22	SAMN41403858	Formby et al., 2025
TDBGH_10_ON268-2		1	1	1	1	0	0	1	0	0	0	0	0	0	1	0	0	0	1	0	1	NA5	88.14	SAMN41404110	Formby et al., 2025
TDBGH_11_MB12-1		1	1	1	1	0	0	1	0	0	0	0	0	0	1	0	0	0	1	0	1	NA5	8.53	SAMN48203077	this work
TDBGH_12_MB11-1		1	1	1	1	0	0	1	0	0	0	0	0	0	1	0	0	0	1	0	1	NA5	91.61	SAMN41404111	Formby et al., 2025
TDBJK_09_AB168-4		1	1	1	1	0	0	1	0	0	0	0	0	0	1	1	0	0	1	1	1	NA5	92.17	SAMN41404112	Formby et al., 2025
TDBJT_11_MB1-1a		1	1	1	1	0	0	1	0	0	0	0	0	0	1	1	0	1	1	1	1	NA5	85.59	SAMN41404113	Formby et al., 2025
TDBQK_11_MB3-1		1	1	1	1	0	0	1	0	0	0	0	0	1	1	0	0	0	1	1	1	NA5	91.41	SAMN41404114	Formby et al., 2025
TDPNS_12_ON152-2		1	1	1	1	0	0	1	0	1	0	1	1	1	0	1	0	1	1	1	0	NA3	91.62	SAMN41404115	Formby et al., 2025
TDPSS_11_SK229-1		1	1	1	1	0	0	1	0	1	0	1	1	1	1	1	0	1	1	1	0	NA3	91.99	SAMN41404116	Formby et al., 2025
TGBJK_98_MB6-2		1	1	1	1	0	1	0	0	0	0	0	0	0	1	1	0	0	1	1	1	NA5	4.12	SAMN48203078	this work
TJBJK_98_MB5-2		1	1	1	1	0	1	1	0	0	0	0	0	0	1	1	0	0	1	1	1	NA5	2.94	SAMN48203079	this work
TJBJT_99_MB144-1		1	1	1	1	0	1	1	0	0	0	0	0	0	1	1	0	1	1	1	1	NA5	95.8	SAMN41404117	Formby et al., 2025
TKBJK_00_SK33-1		1	1	1	1	0	1	1	1	0	0	0	0	0	1	1	0	0	1	1	1	NA5	91.44	SAMN41404118	Formby et al., 2025
TNBGH_12_MB41-1		1	1	1	1	1	0	1	0	0	0	0	0	0	1	0	0	0	1	0	1	NA5	91.34	SAMN41404119	Formby et al., 2025
TNBJ_10_MB108-2		1	1	1	1	1	0	1	0	0	0	0	0	0	1	1	0	0	0	0	0	NA5	92.15	SAMN41404120	Formby et al., 2025
a Isolate name consists of the virulence profile as per Long and Kolmer, 1989, followed by the year of isolation, province of collection (AB=Alberta; MB=Manitoba; NS=Nova Scotia; ONB=Ontario; PEI=Prince Edward Island; QC=Quebec; SK=Saskatchewan, and isolate number.
b clade refers to the genetic lineage in the north-American Pt population (as per Formby et al., 2025).
TJBJK_98_MB5-2 was eliminated from association studies due to high percentage of missing data.
