# Supplementary material for: Avirulence genes identified through linkage mapping and region-specific association studies in the wheat leaf rust pathogen Puccinia triticina
Source: Research Square preprint supplement (doi:10.21203/rs.3.rs-7264203/v1), 2025-08-22
Supplement: Supplementary file 5 [file a510d40ce49e735369ac5e91.xlsx]

## Sheet: Table S2
Table S2. F1 virulence phenotypes on differential near-isogenic wheat lines and segregation of avirulent/virulent in four F2 populations generated from a sexual cross of Puccinia triticina race 9 x race 161
Lr gene	race9	race161	F21		F22		F23		F24		F21 + F23			F22 + F24
			F1 rating	Observed ratio	F1 rating	Observed ratio	F1 rating	Observed ratio	F1 rating	Observed ratio	Observed ratio	Expected ratio	P	Observed ratio	Expected ratio	P
Lr1	1	0	0	32:11	1	3:60	0	27:12	1	0:76	59:23	3:1	0.523749	3:136	HV	_
Lr2a	1	0	0	23:20	1	4:59	0	23:16	1	0:76	46:36	9:7	0.977896	4:135	HV	_
Lr2b	1	0	0	20:23	1	3:60	0	20:19	1	0:76	40:42	7:9	0.358482	3:136	HV	_
Lr2c	1	1	1	14:29	1	4:59	1	18:21	1	3:73	32:50	7:9	0.39	7:132	HV	_
Lr3	0	1	0	43:0	0	51:12	0	36:3	0	65:11	79:3	HA	_	116:23	13:3	0.103447
Lr3bg	0	1	0	37:6	0	52:11	0	24:15	0	58:18	61:21	3:1	0.898533	110:29	3:1	0.260032
Lr3ka	0	0	0	43:0	0	53:10	0	39:0	0	60:16	82:0	HA	_	113:26	3:1	0.0865366
Lr11	0	0	0	36:7	0	60:3	0	33:6	0	74:2	69:13	3:1	0.0557826	134:5	HA	_
Lr14a	0	1	0	32:11	0	46:17	0	24:15	0	49:27	56:26	3:1	0.160716	95:44	3:1	0.070002
Lr14b	1	0	1	13:30	1	14:49	1	15:24	1	22:54	28:54	1:3	0.0557826	36:103	1:3	0.806572
Lr23	0	0	0	40:3	0	59:4	0	34:5	0	76:0	74:8	HA	_	135:4	HA	_
Lr28	1	1	1	9:34	1	17:46	1	15:24	1	17:59	24:58	1:3	0.372067	34:105	1:3	0.883203
Lr30	0	0	0	43:0	0	52:11	0	38:1	0	60:16	81:1	HA	_	112:27	3:1	0.128995
LrB	0	1	0	15:28	0	55:8	0	13:26	0	68:8	28:54	1:3	0.0557826	123:16	HA	_
HA=homozygous avirulent; HV=homozygous virulent
